# Supplementary material for: Advance Care Planning in Neurodegenerative Disorders: A Scoping Review
Source: MDPI journal article supplement (doi:10.3390/ijerph19020803), 2022-01-12
Supplement: s1 [file s1]

**Table S6.** Mixed Methods Appraisal Tool (MMAT) for mixed method studies.

| First author,<br>publication<br>year <sup>ref. no.</sup> | Are there clear<br>research<br>questions? | 1 | Do the<br>collected<br>data allow to<br>address the<br>research<br>questions? | 2 | Is there an<br>adequate<br>rationale for<br>using a mixed<br>methods<br>design to<br>address the<br>research<br>question? | 3 | Are the<br>different<br>componen<br>ts of the<br>study<br>effectively<br>integrated<br>to answer<br>the<br>research<br>question? | 4 | Are the<br>outputs of<br>the<br>integration<br>of<br>qualitative<br>and<br>quantitative<br>components<br>adequately<br>interpreted? | 5 | Are<br>divergences<br>and<br>inconsistencie<br>s between<br>quantitative<br>and<br>qualitative<br>results<br>adequately<br>addressed? | 6 | Do the different<br>components of<br>the study adhere<br>to the quality<br>criteria of each<br>tradition of the<br>methods<br>involved? | 7 | Score |
|----------------------------------------------------------|-------------------------------------------|---|-------------------------------------------------------------------------------|---|---------------------------------------------------------------------------------------------------------------------------|---|----------------------------------------------------------------------------------------------------------------------------------|---|-------------------------------------------------------------------------------------------------------------------------------------|---|---------------------------------------------------------------------------------------------------------------------------------------|---|-----------------------------------------------------------------------------------------------------------------------------------------|---|-------|
| Dassel et al,<br>2019 <sup>52</sup>                      | Y                                         | Y | Y                                                                             | Y | Y                                                                                                                         | Y | Y                                                                                                                                | Y | Y                                                                                                                                   | Y | U                                                                                                                                     | U | Y                                                                                                                                       | Y | 6/7   |
| Lee et al,<br>2020 <sup>50</sup>                         | Y                                         | Y | Y                                                                             | Y | Y                                                                                                                         | Y | Y                                                                                                                                | Y | Y                                                                                                                                   | Y | U                                                                                                                                     | U | U                                                                                                                                       | U | 5/7   |
