# Supplementary material for: Advance Care Planning in Neurodegenerative Disorders: A Scoping Review
Source: MDPI journal article supplement (doi:10.3390/ijerph19020803), 2022-01-12
Supplement: s1 [file s1]

## File S2: PubMed search strategy

**Research question: Advance care planning in neurodegenerative disorders**

**Search dates: inception – 28<sup>th</sup> December 2020**

"Advance Care Planning"[Mesh] OR "advance care planning" OR "advance medical planning" OR "advance health care planning" OR advance directive\* OR "Advance Directives"[Mesh] OR "Terminal Care"[Mesh] OR "terminal care" OR "Living Wills"[Mesh] OR living will\* OR "advanced care planning" OR "Treatment Refusal"[Mesh] OR "Withholding Treatment"[Mesh] OR "withholding treatment" OR "advance decision" OR ACP OR treatment refus\* OR treatment withhold\* OR treatment withdraw\* OR SDM OR shared decision\* OR health care wish\* OR "wish for end-of-life care" OR "wishes for end-of-life care" OR "wishes for end of life care" OR "wish for end of life care" OR health care preference\* OR "preference for end-of-life care" OR "preferences for end-of-life care" OR "preferences for end of life care" OR "preference for end of life care" OR end-of-life preference\* OR end of life preference\* OR palliative care plan\* OR "desired care" OR end of life decision\* OR end-of-life decision\* OR advance decision\* OR advance care plan\* OR goals of care

AND

Progressive neurological diseases OR "Neurology"[Mesh] OR neurol\* OR "Nervous System Diseases"[Mesh] OR Nervous System Disease OR Neurologic\* Disorders OR Nervous System Disorder\* OR "Neurodegenerative Diseases"[Mesh] OR Neurodegenerative Disease\* OR Neurodegenerative Disorder\* OR Neurologic Degenerative Condition\* OR Degenerative Neurologic Disorder\* OR dementia OR "Dementia"[Mesh] OR "Alzheimer Disease"[Mesh] OR Alzheimer's Disease OR Senile Dementia OR Alzheimer dementia OR "Huntington Disease"[Mesh] OR Huntington Chorea OR Huntington's Disease OR "Amyotrophic Lateral Sclerosis"[Mesh] OR Gehrig Disease OR Charcot Disease OR Guam Disease OR Amyotrophic Lateral Sclerosis OR ALS OR "Parkinson Disease"[Mesh] OR Idiopathic Parkinson's Disease OR Lewy Body Parkinson's Disease OR Primary Parkinsonism OR "Parkinson Disease, Secondary"[Mesh] OR secondary Parkinson Disease OR Symptomatic Parkinson Disease OR Atherosclerotic Parkinsonism OR "Multiple Sclerosis"[Mesh] OR Disseminated Sclerosis OR MS OR Multiple Sclerosis OR "Neuromuscular Diseases"[Mesh] OR Neuromuscular Disease OR Foley-Denny-Brown Syndrome OR Benign Fasciculation-Cramp Syndrome\* OR Cramp-Fasciculation Syndrome\* OR Oppenheims Disease OR Amyotonia Congenita OR "Brain Neoplasms"[Mesh] OR Brain Neoplasm OR brain tumor OR brain cancer
