# Supplementary material for: Advance Care Planning in Neurodegenerative Disorders: A Scoping Review
Source: MDPI journal article supplement (doi:10.3390/ijerph19020803), 2022-01-12
Supplement: s1 [file s1]

**Table S3.** CASP quality assessment for case control studies.

| First author,<br>publication year <sup>ref. no.</sup> | 1. Did the study address a clearly focused issue? | 2. Did the authors use an appropriate method to answer their question? | 3. Were the cases recruited in an acceptable way? | 4. Were the controls selected in an acceptable way? | 5. Was the exposure accurately measured to minimize bias? | 6. Have the authors taken account of the potential confounding factors in the design and/or in their analysis? | 7. How precise was the estimate of the treatment effect? | 8. Do you believe the results? | Score |
|-------------------------------------------------------|---------------------------------------------------|------------------------------------------------------------------------|---------------------------------------------------|-----------------------------------------------------|-----------------------------------------------------------|----------------------------------------------------------------------------------------------------------------|----------------------------------------------------------|--------------------------------|-------|
| Ampe et al, 2017 <sup>61</sup>                        | Y                                                 | Y                                                                      | Y                                                 | U                                                   | Y                                                         | U                                                                                                              | U                                                        | Y                              | 5/8   |
| Cotter et al, 2019 <sup>62</sup>                      | Y                                                 | Y                                                                      | U                                                 | U                                                   | U                                                         | U                                                                                                              | Y                                                        | N                              | 3/8   |

Y= yes; N= no; U= unclear
