# Supplementary material for: Advance Care Planning in Neurodegenerative Disorders: A Scoping Review
Source: MDPI journal article supplement (doi:10.3390/ijerph19020803), 2022-01-12
Supplement: s1 [file s1]

**Table S5.** CASP quality assessment for qualitative studies.

| First author, publication year <sup>ref. no.</sup> | 1. Was there a clear statement of the aims of the research? | 2. Is a qualitative methodology appropriate? | 3. Was the research design appropriate to address the aims of the research? | 4. Was the recruitment strategy appropriate to the aims of the research? | 5. Was the data collected in a way that addressed the research issue? | 6. Has the relationship between researcher and participants been adequately considered? | 7. Have ethical issues been taken into consideration? | 8. Was the data analysis sufficiently rigorous? | 9. Is there a clear statement of findings? | Score |
|----------------------------------------------------|-------------------------------------------------------------|----------------------------------------------|-----------------------------------------------------------------------------|--------------------------------------------------------------------------|-----------------------------------------------------------------------|-----------------------------------------------------------------------------------------|-------------------------------------------------------|-------------------------------------------------|--------------------------------------------|-------|
| Abbott et al, 2017 <sup>81</sup>                   | Y                                                           | Y                                            | Y                                                                           | Y                                                                        | Y                                                                     | U                                                                                       | Y                                                     | Y                                               | Y                                          | 8/9   |
| Cutshall et al, 2020 <sup>74</sup>                 | Y                                                           | Y                                            | Y                                                                           | Y                                                                        | Y                                                                     | U                                                                                       | N                                                     | U                                               | Y                                          | 6/9   |
| Fried et al, 2020 <sup>45</sup>                    | Y                                                           | Y                                            | Y                                                                           | Y                                                                        | Y                                                                     | U                                                                                       | Y                                                     | Y                                               | U                                          | 7/9   |
| Fritz et al, 2020 <sup>75</sup>                    | Y                                                           | Y                                            | U                                                                           | Y                                                                        | Y                                                                     | U                                                                                       | Y                                                     | U                                               | Y                                          | 6/9   |
| Llewellyn et al, 2018 <sup>76</sup>                | Y                                                           | Y                                            | U                                                                           | Y                                                                        | Y                                                                     | U                                                                                       | Y                                                     | Y                                               | Y                                          | 7/9   |
| Lum et al, 2019 <sup>9</sup>                       | Y                                                           | Y                                            | U                                                                           | Y                                                                        | Y                                                                     | U                                                                                       | Y                                                     | Y                                               | Y                                          | 7/9   |
| Murray et al, 2016 <sup>71</sup>                   | Y                                                           | Y                                            | U                                                                           | Y                                                                        | Y                                                                     | Y                                                                                       | Y                                                     | Y                                               | Y                                          | 8/9   |
| Perin et al, 2020 <sup>55</sup>                    | Y                                                           | Y                                            | Y                                                                           | Y                                                                        | Y                                                                     | U                                                                                       | Y                                                     | Y                                               | Y                                          | 8/9   |
| Preston et al, 2012 <sup>72</sup>                  | Y                                                           | Y                                            | U                                                                           | Y                                                                        | Y                                                                     | U                                                                                       | N                                                     | Y                                               | Y                                          | 6/9   |
| Rosemond et al, 2017 <sup>64</sup>                 | Y                                                           | Y                                            | Y                                                                           | Y                                                                        | Y                                                                     | U                                                                                       | Y                                                     | Y                                               | Y                                          | 8/9   |
| Seeber et al, 2019 <sup>73</sup>                   | Y                                                           | Y                                            | Y                                                                           | Y                                                                        | Y                                                                     | U                                                                                       | Y                                                     | Y                                               | Y                                          | 8/9   |
| Sussman et al, 2020 <sup>44</sup>                  | Y                                                           | Y                                            | Y                                                                           | Y                                                                        | Y                                                                     | U                                                                                       | Y                                                     | Y                                               | Y                                          | 8/9   |
| Van Rickstal et al, 2019 <sup>46</sup>             | Y                                                           | Y                                            | Y                                                                           | U                                                                        | Y                                                                     | U                                                                                       | Y                                                     | Y                                               | Y                                          | 7/9   |
| Van Rickstal et al, 2020 <sup>47</sup>             | Y                                                           | Y                                            | Y                                                                           | Y                                                                        | Y                                                                     | U                                                                                       | Y                                                     | Y                                               | Y                                          | 8/9   |

Y= yes; N= no; U= unknown.
