# Supplementary material for: Advance Care Planning in Neurodegenerative Disorders: A Scoping Review
Source: MDPI journal article supplement (doi:10.3390/ijerph19020803), 2022-01-12
Supplement: s1 [file s1]

**Figure S2.** Risk of bias summary: review authors’ judgements about each risk of bias item for each included study.

|                | Random sequence generation (selection bias) | Allocation concealment (selection bias) | Blinding of participants and personnel (performance bias) | Blinding of outcome assessment (detection bias) | Incomplete outcome data (attrition bias) | Selective reporting (reporting bias) | Other bias |
|----------------|---------------------------------------------|-----------------------------------------|-----------------------------------------------------------|-------------------------------------------------|------------------------------------------|--------------------------------------|------------|
| Bonner 2020    | +                                           | ?                                       | ?                                                         | ?                                               | -                                        | +                                    | +          |
| Brazil 2018    | +                                           | -                                       | ?                                                         | ?                                               | +                                        | +                                    | ?          |
| Goossens 2020a | +                                           | ?                                       | +                                                         | +                                               | ?                                        | +                                    | ?          |
| Hanson 2017    | ?                                           | ?                                       | ?                                                         | +                                               | +                                        | +                                    | +          |
| Mitchell 2018  | +                                           | +                                       | +                                                         | +                                               | +                                        | +                                    | ?          |
| Mitchell 2020  | +                                           | ?                                       | ?                                                         | +                                               | +                                        | +                                    | +          |
| Saevareid 2019 | ?                                           | ?                                       | ?                                                         | -                                               | +                                        | +                                    | ?          |
| Sampson 2011   | +                                           | ?                                       | ?                                                         | +                                               | ?                                        | ?                                    | +          |
| Song 2019      | +                                           | +                                       | ?                                                         | +                                               | ?                                        | +                                    | ?          |
| Tilburgs 2020a | +                                           | +                                       | +                                                         | +                                               | ?                                        | +                                    | +          |
