# Supplementary material for: Advance Care Planning in Neurodegenerative Disorders: A Scoping Review
Source: MDPI journal article supplement (doi:10.3390/ijerph19020803), 2022-01-12
Supplement: s1 [file s1]

**Table S2.** Quality appraisal of the included reviews (AMSTAR-2 tool minus the questions about meta-analysis Q11, Q12, Q15).

| First author,<br>publication year <sup>ref. no.</sup> | Q1  | Q2             | Q3  | Q4             | Q5  | Q6  | Q7             | Q8             | Q9  | Q10 | Q13 | Q14 | Q16 | Score  |
|-------------------------------------------------------|-----|----------------|-----|----------------|-----|-----|----------------|----------------|-----|-----|-----|-----|-----|--------|
| Beck et al, 2015 <sup>53</sup>                        | Yes | No             | No  | Partial<br>yes | No  | No  | Partial<br>yes | Yes            | No  | No  | No  | Yes | Yes | 5/13   |
| Geshell et al, 2019 <sup>42</sup>                     | Yes | Partial<br>yes | No  | Partial<br>yes | Yes | Yes | No             | Yes            | Yes | No  | Yes | Yes | Yes | 9/13   |
| Keijzer-van Laarhoven<br>et al, 2020 <sup>54</sup>    | Yes | Yes            | No  | Yes            | Yes | Yes | Partial<br>yes | Yes            | Yes | No  | Yes | No  | Yes | 9.5/13 |
| Phenwan et al, 2020 <sup>49</sup>                     | Yes | No             | No  | Yes            | Yes | No  | No             | Partial<br>yes | No  | Yes | No  | Yes | Yes | 6.5/13 |
| Song et al, 2016 <sup>78</sup>                        | Yes | Partial<br>yes | No  | Yes            | Yes | Yes | Partial<br>yes | Yes            | Yes | No  | Yes | Yes | Yes | 10/13  |
| Lai et al, 2019 <sup>43</sup>                         | Yes | Partial<br>yes | No  | Yes            | No  | No  | Partial<br>yes | No             | Yes | No  | Yes | Yes | Yes | 7/13   |
| Murray et al, 2016 <sup>70</sup>                      | Yes | Partial<br>yes | No  | Partial<br>yes | No  | No  | Partial<br>yes | Yes            | Yes | Yes | Yes | Yes | No  | 7/13   |
| Sellars et al, 2019 <sup>48</sup>                     | Yes | Partial<br>yes | Yes | Partial<br>yes | Yes | No  | Partial<br>yes | Partial<br>yes | Yes | No  | Yes | Yes | Yes | 9/13   |
| Wendrich-van Dael et<br>al, 2020                      | Yes | Yes            | No  | Partial<br>yes | No  | No  | Partial<br>yes | Yes            | Yes | No  | Yes | Yes | Yes | 8/13   |

## QUESTIONS

1. Did the research questions and inclusion criteria include the components of PICO?
2. Did the report of the review contain an explicit statement that the review methods were established prior to the conduct of the review and did the report justify any significant deviations from the protocol?
3. Did the review authors explain their selection of the study designs for inclusion in the review?
4. Did the review authors use a comprehensive literature search strategy?
5. Did the review authors perform study selection in duplicate?
6. Did the review authors perform data extraction in duplicate?
7. Did the review authors provide a list of excluded studies and justify the exclusions?
8. Did the review authors describe the included studies in adequate detail?
9. Did the review authors use a satisfactory technique for assessing quality in individual studies that were included in the review?
10. Did the review authors report on the sources of funding for the studies included in the review?
13. Did the review authors account for quality in individual studies when interpreting/discussing the results of the review?
14. Did the review authors provide a satisfactory explanation for, and discussion of, any heterogeneity observed in the results of the review?
16. Did the review authors report any potential sources of conflict of interest, including any funding they received for conducting the review?
