# Supplementary material for: Advance Care Planning in Neurodegenerative Disorders: A Scoping Review
Source: MDPI journal article supplement (doi:10.3390/ijerph19020803), 2022-01-12
Supplement: s1 [file s1]

**Table S1.** Overview of included studies.

| First author, publication year <sup>ref. no.</sup> | Neurodegenerative disorder                | ACP definition                     | Country | Design                                      | Sample                                                                               | Setting                   | Aim                                                                                                                                                                                                                                                     |
|----------------------------------------------------|-------------------------------------------|------------------------------------|---------|---------------------------------------------|--------------------------------------------------------------------------------------|---------------------------|---------------------------------------------------------------------------------------------------------------------------------------------------------------------------------------------------------------------------------------------------------|
| Abbott et al, 2017 <sup>81</sup>                   | Duchenne muscular dystrophy               | EOL/conversations/ decision making | UK      | Qualitative study                           | People with DMD (N=15)                                                               | Community                 | To deepen understanding regarding a range of EOL issues, interventions, practices, and planning; and to focus on views and preferences of men with Duchenne muscular dystrophy.                                                                         |
| Ampe et al, 2017 <sup>61</sup>                     | Dementia                                  | Process                            | Belgium | Quasi-experimental pre-test–post-test study | NH staff: IG (N=19); CG (N=9).                                                       | NH                        | To assess the influence of ‘weDECide–Discussing End-of-life Choices’ intervention on policy and practice of ACP in NHs. To investigate the NH management and clinical staff’s perceived barriers and facilitators for the implementation of SDM in ACP. |
| Beck et al, 2015 <sup>53</sup>                     | Dementia                                  | Process                            | UK      | Narrative literature review                 | HPs (N=1305)                                                                         | Community, NH, inpatients | To provide an up-to-date synthesis of HPs’ perspectives on ACP, and of challenges encountered.                                                                                                                                                          |
| Benditt et al, 2001 <sup>67</sup>                  | ALS/MND                                   | Process                            | US      | Commentary                                  | Patients with ALS                                                                    | n.a.                      | To devise a disease-specific ACP tool for ALS, focusing on the use of mechanical ventilation.                                                                                                                                                           |
| Bonner et al, 2020 <sup>33</sup>                   | Dementia                                  | Not reported                       | US      | RCT                                         | Caregivers of people with dementia: IG (N=173); CG (N=185)                           | Community                 | To assess the efficacy of the Advance Care Treatment Plan intervention, in comparison with attention control.                                                                                                                                           |
| Brazil et al, 2018 <sup>34</sup>                   | Dementia                                  | Process                            | UK      | RCT                                         | Residents with dementia, including family members and GPs: NH IG, N=12; NH CG: N=12. | NH                        | To develop a family focused ACP intervention and evaluate its impact in dementia care NHs.                                                                                                                                                              |
| Cheung et al, 2017 <sup>82</sup>                   | Stroke, myopathies, MND, MS, parkinsonism | AD/discussion                      | China   | Observational, retrospective study          | Neurology patients (N=25)                                                            | Inpatient                 | To assess EOL care preferences, documentation, and communication in patients with various types of advanced neurological disorders.                                                                                                                     |

| First author, publication year <sup>ref. no.</sup> | Neurodegenerative disorder | ACP definition                     | Country | Design                   | Sample                                                                                                                                                                                                                                                                     | Setting                   | Aim                                                                                                                                                                                                                                                                                                     |
|----------------------------------------------------|----------------------------|------------------------------------|---------|--------------------------|----------------------------------------------------------------------------------------------------------------------------------------------------------------------------------------------------------------------------------------------------------------------------|---------------------------|---------------------------------------------------------------------------------------------------------------------------------------------------------------------------------------------------------------------------------------------------------------------------------------------------------|
| Cotter et al, 2019 <sup>62</sup>                   | Dementia                   | Conversations, written document/AD | US      | Pre-post study (one arm) | Physicians (N=164)                                                                                                                                                                                                                                                         | Inpatient                 | To increase the rate of ACP conversations and documentation in a dementia specialty practice; and to assess the effectiveness of a brief, educational intervention on physician knowledge, attitudes, and skills; and to evaluate the prevalence of ACP documentation in the electronic medical record. |
| Cottrell et al, 2020                               | MS                         | Process                            | UK      | Realist review           | -                                                                                                                                                                                                                                                                          | Community, NH, inpatients | To develop and revise a theory on ACP engagement for patients with MS, and to identify ways to improve its uptake.                                                                                                                                                                                      |
| Cutshall et al, 2020 <sup>8</sup>                  | Brain tumors               | Conversations                      | US      | Qualitative study        | Brain tumor patients (N=21), caregivers (N=5), advocates or organizational members (N=12), and clinicians or researchers (N=14).                                                                                                                                           | Community                 | To analyze data from the Brain Tumor Stakeholder Twitter community chat, and to identify barriers of brain tumor stakeholders to ACP conversations.                                                                                                                                                     |
| Dassel et al, 2019 <sup>52</sup>                   | Dementia                   | Process/AD                         | US      | Mixed-method             | Phase 1: people with early-stage dementia (N=6), and caregivers (N=11). Phase 2: HPs (N=10); Phase 3: older healthy adults (N=153) and people with early-stage dementia (N=38). Phase 4: caregivers (N=14), healthy adults (N=10), people with early-stage dementia (N=6). | Community, inpatients     | To develop a valid and reliable tool which captures the EOL care preferences and values of people with dementia.                                                                                                                                                                                        |

| First author, publication year <sup>ref. no.</sup> | Neurodegenerative disorder | ACP definition | Country         | Design                         | Sample                                                                                             | Setting                               | Aim                                                                                                                                                                                                                                                                         |
|----------------------------------------------------|----------------------------|----------------|-----------------|--------------------------------|----------------------------------------------------------------------------------------------------|---------------------------------------|-----------------------------------------------------------------------------------------------------------------------------------------------------------------------------------------------------------------------------------------------------------------------------|
| Fried et al, 2020 <sup>45</sup>                    | Dementia                   | Process        | US              | Qualitative study              | People with mild cognitive impairment or early dementia (N=28), and caregivers (N=19)              | Outpatient                            | To investigate views on participation in dementia-specific ACP planning among patients with early-stage cognitive impairment and their caregivers. To deepen participants' understanding of the needs for and readiness to plan, and of barriers/facilitators for planning. |
| Fritz et al, 2020 <sup>75</sup>                    | Brain tumors               | Process        | The Netherlands | Qualitative study              | Focus group: HPs (N=9). Interviews: patient-proxy dyads (N=8), proxies of deceased patients (N=5). | Outpatient                            | To develop an ACP program specifically for glioblastoma patients. To identify topics which are relevant for patients and their proxies, as well as practical issues and barriers/facilitators to participate in the ACP program.                                            |
| Geshell et al, 2019 <sup>42</sup>                  | Dementia                   | Process        | US              | Integrative literature review  | Patients, carers, or HPs ranging from 6 to 661. Patients living with dementia (N=1304)             | Community, NH, inpatients, outpatient | To identify and evaluate the literature regarding the perspectives and the experiences of people with dementia on ACP; and to inform current research and practice.                                                                                                         |
| Goossens et al, 2020 <sup>35</sup>                 | Dementia                   | Process        | Belgium         | RCT                            | NH wards (IG, N=34, CG, N=31), including staff members (N=311).                                    | NH                                    | To increase the level of SDM in ACP conversations as well as the perceived competencies, the importance and frequency of SDM in dementia care.                                                                                                                              |
| Goossens et al, 2020 <sup>51</sup>                 | Dementia                   | Process        | Belgium         | Observational, cross-sectional | HPs (N=311)                                                                                        | NH                                    | To explore how people with dementia and HPs perceive the SDM level during ACP conversations. To assess HPs' perceptions of the importance of SDM, their competence and frequency of utilizing SDM.                                                                          |
| Hanson et al, 2017 <sup>39</sup>                   | Dementia                   | Goals of care  | USA             | RCT                            | People with advanced dementia (IG, N=151; CG, N=151), and their family decision makers (N=22)      | NH                                    | To investigate whether the goals-of-care intervention improves decision making and quality of communication; to test whether the intervention would improve palliative care for advanced dementia.                                                                          |
| Hossler et al, 2011 <sup>68</sup>                  | ALS                        | Process        | USA             | Pre-post study (one arm)       | People with ALS (N=17)                                                                             | Outpatient                            | To evaluate the feasibility of 'Making Your Wishes Known' decision aid for helping patients with ALS engage in ACP.                                                                                                                                                         |

| First author, publication year <sup>ref. no.</sup> | Neurodegenerative disorder | ACP definition      | Country         | Design                                                | Sample                                                                                                                                                                         | Setting               | Aim                                                                                                                                                                                  |
|----------------------------------------------------|----------------------------|---------------------|-----------------|-------------------------------------------------------|--------------------------------------------------------------------------------------------------------------------------------------------------------------------------------|-----------------------|--------------------------------------------------------------------------------------------------------------------------------------------------------------------------------------|
| Huang et al, 2020 <sup>63</sup>                    | Dementia                   | EOL discussion      | Taiwan          | Pre-post study (one arm)                              | People with mild cognitive impairment or mild dementia and their family caregivers (N=40 dyads)                                                                                | Outpatient            | To explore the effects of a family-centered ACP information intervention in people with dementia and their carers.                                                                   |
| Katwa et al, 2020 <sup>60</sup>                    | Dementia                   | Process             | UK              | Pre-post study (one arm)                              | Care home staff (N=78)                                                                                                                                                         | Community             | To evaluate the effect of a one-day simulation training for care home staff on ACP.                                                                                                  |
| Keijzer-van Laarhoven et al, 2020 <sup>54</sup>    | Dementia                   | EOL discussion      | The Netherlands | Meta-review of systematic reviews and primary studies | -                                                                                                                                                                              | Community, outpatient | To better understand the physicians' moral considerations in long-term care and primary care settings with ethical dilemmas on ACP with people with dementia and their carers.       |
| Konttila et al, 2020 <sup>57</sup>                 | Dementia                   | EOL discussion      | Finland         | Observational, retrospective study                    | Patients with advanced dementia (N=403): Group 1 (N=212), and Group 2 (N=191).                                                                                                 | NH                    | To investigate changes in ACP related to physician treatment orders, symptom prevalence, and possible burdensome interventions of patients who died between 2004–2009 and 2010–2013. |
| Lai et al, 2019 <sup>42</sup>                      | Dementia                   | Process             | Australia       | Systematic integrative review                         | -                                                                                                                                                                              | Community, NH         | To identify the key factors for engagement in the decision-making process related to the future care of people with dementia.                                                        |
| Lee et al, 2018 <sup>56</sup>                      | Dementia                   | Process             | Canada          | Observational, cross-sectional                        | HPs (N=261)                                                                                                                                                                    | Outpatient            | To assess HPs' desire for more information/education on ACP, capacity for/attitudes toward ACP, and current ACP practices in their clinical practice.                                |
| Lee et al, 2020 <sup>50</sup>                      | Dementia                   | Discussions/process | Canada          | Mixed-method                                          | Surveys: HPs (N=12), people with dementia (N=13), and surrogate decision makers (N=16). Interviews: HPs (N=8); people with dementia (N=1), and surrogate decision makers (N=7) | Outpatient            | To pilot test an ACP framework tool to be used with people with dementia in primary care-based memory clinics; To describe user/recipient experiences with this framework.           |

| First author, publication year <sup>ref. no.</sup> | Neurodegenerative disorder | ACP definition                                                   | Country   | Design                         | Sample                                                                                                        | Setting               | Aim                                                                                                                                                                                               |
|----------------------------------------------------|----------------------------|------------------------------------------------------------------|-----------|--------------------------------|---------------------------------------------------------------------------------------------------------------|-----------------------|---------------------------------------------------------------------------------------------------------------------------------------------------------------------------------------------------|
| Levi et al, 2017 <sup>69</sup>                     | ALS/MND                    | Not reported                                                     | US        | Pre-post study (one arm)       | Patients with ALS (N=44); HPs (N=15)                                                                          | Outpatient            | To assess the impact of an interactive web-based decision aid on communication between patients with ALS and treating clinicians regarding EOL wishes.                                            |
| Llewellyn et al, 2018 <sup>76</sup>                | Brain tumors               | Process                                                          | UK        | Qualitative study              | HPs (N=15)                                                                                                    | Outpatient            | To investigate key social and structural conditions contributing to an observed avoidance of ACP practice by HPs working in neuro-oncology.                                                       |
| Lum et al, 2019 <sup>9</sup>                       | Parkinson's disease        | Process                                                          | US        | Qualitative study              | Patients (N=60)                                                                                               | Outpatient            | To elicit perspectives from patients and carers on ACP to inform a patient and care partner-centered framework for Parkinson's disease research and clinical practice.                            |
| Mitchell et al, 2018 <sup>36</sup>                 | Dementia                   | Discussions                                                      | US        | RCT                            | People with advanced dementia (N=402) and their proxies (IG: N=212; CG: N=190). NHs (N=64: IG N=32; CG N=32). | NH                    | To test the impact of an ACP video (versus usual care) on documented ADs, level of care preferences, goals-of-care discussions, and burdensome treatments among NH people with advanced dementia. |
| Mitchell et al, 2020 <sup>31</sup>                 | Dementia                   | Modifiable factor associated with better palliative care outcome | US        | RCT                            | NHs (IG, N=119; CG, N=241).                                                                                   | NH                    | To test the effect of an ACP video program on hospital transfers, burdensome treatments, and hospice enrollment among long-stay nursing home residents with and without advanced illness.         |
| Moss et al, 2018 <sup>59</sup>                     | Dementia                   | EOL planning                                                     | US        | Observational, cross-sectional | Caregivers (N=65)                                                                                             | Community             | To determine the number of formal/informal EOL care plans that existed among a convenience sample of African American older adults with dementia.                                                 |
| Murray et al, 2016 <sup>70</sup>                   | MND                        | Process                                                          | Australia | Systematic review              | -                                                                                                             | Community, outpatient | To report the prevalence, content, patient/caregiver benefits, HP awareness/support, and healthcare outcomes associated with ACP in MND.                                                          |
| Murray et al, 2016 <sup>71</sup>                   | MND                        | AD                                                               | Australia | Qualitative study              | Carers (N=18)                                                                                                 | Outpatient            | To elicit the experiences of bereaved caregivers of MND patients who had or had not completed the letter of future care.                                                                          |
| Perin et al, 2020 <sup>55</sup>                    | Dementia                   | Process                                                          | Italy     | Qualitative study              | Physicians (N=11)                                                                                             | Outpatient            | To explore the perception of physicians providing care to people with dementia                                                                                                                    |

| First author, publication year <sup>ref. no.</sup> | Neurodegenerative disorder | ACP definition               | Country | Design                             | Sample                                            | Setting    | Aim                                                                                                                                                                                                                                   |
|----------------------------------------------------|----------------------------|------------------------------|---------|------------------------------------|---------------------------------------------------|------------|---------------------------------------------------------------------------------------------------------------------------------------------------------------------------------------------------------------------------------------|
|                                                    |                            |                              |         |                                    |                                                   |            | regarding ACP, and to describe their difficulties and needs.                                                                                                                                                                          |
| Pettigrew et al, 2019 <sup>58</sup>                | Dementia                   | Process/AD                   | US      | Observational, cross-sectional     | Carers (N=431)                                    | Outpatient | To deepen understanding of the factors influencing decision making, preferences and plans regarding ACP and EOL care in people with dementia and their caregivers; and to examine differences by race.                                |
| Phenwan et al, 2020 <sup>49</sup>                  | Dementia                   | Process                      | UK      | Literature review                  | -                                                 | Community  | To identify factors facilitating or inhibiting ACP/AD initiation and review in people with dementia.<br>To assess the current evidence affecting ACP initiation in people with dementia, so as to inform current policy and practice. |
| Pollom et al, 2018 <sup>77</sup>                   | Brain tumors               | Process                      | USA     | Observational, retrospective study | Patients (N=63)                                   | Outpatient | To describe ACP documentation and referral to palliative care in patients with glioblastoma undergoing radiation therapy.                                                                                                             |
| Preston et al, 2012 <sup>72</sup>                  | MND                        | EOL planning formal document | UK      | Qualitative study                  | Carers (N=11)                                     | Outpatient | To evaluate the patients' bereaved relatives' experiences of using the Preferred Priorities for Care document and their perceptions about its impact on EOL care.                                                                     |
| Rosemond et al, 2017 <sup>64</sup>                 | Dementia                   | Not reported                 | US      | Qualitative study                  | Carers (N=16)                                     | NH         | To investigate the family members' experiences using goals-of-care decision making of their relatives' death from advanced dementia.                                                                                                  |
| Saevareid et al, 2019 <sup>40</sup>                | Dementia                   | Process                      | Norway  | RCT                                | NHs (N=8)                                         | NH         | To improve patient participation in ACP conversations, and to assess patient preferences for treatment and decision making, hopes and worries, documented in the patient health records.                                              |
| Sampson et al, 2011 <sup>37</sup>                  | Dementia                   | Process                      | UK      | RCT                                | Patient-carer dyads (N=32): IG (N=22), CG (N=10). | Outpatient | To assess the feasibility of a two-component intervention to improve EOL care for people with advanced dementia.                                                                                                                      |

| First author, publication year <sup>ref. no.</sup> | Neurodegenerative disorder | ACP definition           | Country         | Design                         | Sample                                                                                                                               | Setting                               | Aim                                                                                                                                                                                                                                   |
|----------------------------------------------------|----------------------------|--------------------------|-----------------|--------------------------------|--------------------------------------------------------------------------------------------------------------------------------------|---------------------------------------|---------------------------------------------------------------------------------------------------------------------------------------------------------------------------------------------------------------------------------------|
| Seeber et al, 2019 <sup>73</sup>                   | ALS                        | Process                  | The Netherlands | Qualitative study              | Patients with ALS (N=16); patients with Progressive Muscular Atrophy (N=5)                                                           | Outpatient                            | To evaluate timing and content of discussions on supportive treatment options and EOL care; and to investigate patients' reflections on this practice; and to formulate recommendations about integration of ACP in the patient care. |
| Sellars et al, 2019 <sup>48</sup>                  | Dementia                   | Process                  | Australia       | Systematic review              | People with dementia (N=389), and their carers (N=1864)                                                                              | Community                             | To report the perspectives of people with dementia and their carers on ACP and EOL care in dementia, so as to inform strategies improving patient and carer outcomes.                                                                 |
| Song et al, 2016 <sup>78</sup>                     | Brain tumors               | Discussions or directive | Australia       | Literature review              | -                                                                                                                                    | Community, NH, inpatients, outpatient | To systematically evaluate the current evidence and efficacy of ACP in primary brain tumor patients to inform research and clinical practice.                                                                                         |
| Song et al, 2019 <sup>38</sup>                     | Dementia                   | Not reported             | USA             | RCT                            | Dyads assigned to Spirit in person (N=12); dyads to Spirit remote (N=11).                                                            | Outpatient                            | To adapt and assess feasibility of an ACP intervention for people with dementia and their carers.                                                                                                                                     |
| Sussman et al, 2020 <sup>44</sup>                  | Dementia                   | Process                  | Canada          | Qualitative study              | People with dementia (N=10), family caregivers (N=8)                                                                                 | community                             | To investigate the patient and carer perceptions of and experiences with ACP; to explore practices potentially supporting positive engagement with ACP.                                                                               |
| Tilburgs et al, 2020 <sup>32</sup>                 | Dementia                   | Process                  | The Netherlands | RCT                            | First workshop: cluster GPs (IG, N=19; CG, N=19). Second workshop: GPs (N=38), people with dementia and carers (IG, N=73; CG, N= 67) | Community, outpatient                 | To assess the efficacy of an educational intervention aiming to initiate and optimize ACP, with a focus on discussing medical and non-medical preferences of future care.                                                             |
| Tuck et al, 2015 <sup>80</sup>                     | Parkinson's disease        | Not reported             | USA             | Observational, cross-sectional | Patients (N=255)                                                                                                                     | Outpatient                            | To identify preferences of patients with Parkinson's disease for timing and initiation of discussions on treatment, prognosis, ACP, and EOL care.                                                                                     |
| van Rickstal et al, 2019 <sup>46</sup>             | Dementia                   | Process                  | Belgium         | Qualitative study              | Carers (N=15) of 15 different persons with young-onset dementia.                                                                     | Outpatient                            | To assess the extent to which patients, caregivers had already engaged in ACP, and their preferences for engagement in ACP.                                                                                                           |

| First author, publication year <sup>ref. no.</sup> | Neurodegenerative disorder                 | ACP definition     | Country         | Design                         | Sample                                                      | Setting    | Aim                                                                                                                                                                                                                                                                                  |
|----------------------------------------------------|--------------------------------------------|--------------------|-----------------|--------------------------------|-------------------------------------------------------------|------------|--------------------------------------------------------------------------------------------------------------------------------------------------------------------------------------------------------------------------------------------------------------------------------------|
| Van Rickstal et al, 2020 <sup>47</sup>             | Dementia                                   | Process            | Belgium         | Qualitative study              | Caregivers (N=28)                                           | Outpatient | To explore the carer engagement in and conceptualization of ACP; and identify similarities/differences existing between American and Belgian people with dementia and their carers.                                                                                                  |
| Vandervoort et al, 2014 <sup>10</sup>              | Dementia                                   | Process            | The Netherlands | Observational, cross-sectional | NHs (N=69), with deaths of residents with dementia (N=101). | NH         | To assess to what extent AD as verbal spoken advance communication with patient and/or relatives; and the existence of GP orders relate to the quality of dying in people with dementia.                                                                                             |
| Walter et al, 2019 <sup>19</sup>                   | MS, Parkinson's disease, high grade glioma | Process            | The Netherlands | Observational, cross-sectional | Neurologists (N=89) and residents (N=36).                   | Community  | To investigate timing and content of discussions on treatment restrictions and to initiate, withhold, or withdraw treatment in high grade glioma, PD, and MS, from the neurologist's perspective; and to compare the results with international data about ACP in patients with ALS. |
| Wendrick-van Dael et al, 2020 <sup>41</sup>        | Dementia                                   | Process/discussion | Belgium         | Systematic review              | -                                                           | -          | To investigate the strength of the evidence and provide decision makers with the state of the art on ACP for people with dementia.                                                                                                                                                   |

ACP, advance care planning; AD, advanced directive; ALS, amyotrophic lateral sclerosis; CG, control group; EOL, end of life care; GP, general practitioner; HP, health professional; IG, intervention group; MND, motor neuron disease; NH, nursing home; RCT, n.a., not applicable; RCT, randomized controlled trial; SDM, shared decision making; UK, United Kingdom.
