# Supplementary material for: Advance Care Planning in Neurodegenerative Disorders: A Scoping Review
Source: MDPI journal article supplement (doi:10.3390/ijerph19020803), 2022-01-12
Supplement: s1 [file s1]

**Table S4.** CASP quality assessment for cohort studies.

| <b>First author,<br/>publication<br/>year<sup>ref. no</sup></b> | 1. Did the<br>study<br>address a<br>clearly<br>focused<br>issue? | 2. Was the<br>cohort<br>recruited in an<br>acceptable<br>way? | 3. Was the<br>exposure<br>accurately<br>measured to<br>minimise bias? | 4. Was the<br>outcome<br>accurately<br>measured to<br>minimise bias? | 5.a Have the authors<br>identified all<br>important<br>confounding factors?<br><br>5.b Have they taken<br>account of the<br>confounding factors<br>in the design and/or<br>analysis? | 6.a Was the<br>follow up of<br>subjects<br>complete<br>enough?<br><br>6.b Was the<br>follow up of<br>subjects long<br>enough? | 7. How<br>precise<br>are the<br>results? | 8. Do you<br>believe in<br>the<br>results | Score |
|-----------------------------------------------------------------|------------------------------------------------------------------|---------------------------------------------------------------|-----------------------------------------------------------------------|----------------------------------------------------------------------|--------------------------------------------------------------------------------------------------------------------------------------------------------------------------------------|-------------------------------------------------------------------------------------------------------------------------------|------------------------------------------|-------------------------------------------|-------|
| Cheung et al,<br>2017 <sup>82</sup>                             | Y                                                                | Y                                                             | Y                                                                     | Y                                                                    | U                                                                                                                                                                                    | N/A                                                                                                                           | U                                        | Y                                         | 5/8   |
| Goossens et<br>al, 2020 <sup>51</sup>                           | Y                                                                | Y                                                             | Y                                                                     | Y                                                                    | U                                                                                                                                                                                    | N/A                                                                                                                           | U                                        | Y                                         | 5/8   |
| Hossler et al,<br>2011 <sup>68</sup>                            | Y                                                                | Y                                                             | Y                                                                     | U                                                                    | U                                                                                                                                                                                    | N/A                                                                                                                           | U                                        | Y                                         | 4/8   |
| Huang et al,<br>2020 <sup>63</sup>                              | Y                                                                | Y                                                             | Y                                                                     | Y                                                                    | U                                                                                                                                                                                    | N/A                                                                                                                           | Y                                        | Y                                         | 6/8   |
| Katwa et al,<br>2020 <sup>60</sup>                              | Y                                                                | U                                                             | N/A                                                                   | U                                                                    | U                                                                                                                                                                                    | N/A                                                                                                                           | U                                        | Y                                         | 2/8   |
| Konttila et al,<br>2020 <sup>57</sup>                           | Y                                                                | Y                                                             | Y                                                                     | Y                                                                    | Y                                                                                                                                                                                    | N/A                                                                                                                           | Y                                        | Y                                         | 7/8   |
| Lee et al,<br>2018 <sup>56</sup>                                | Y                                                                | Y                                                             | Y                                                                     | Y                                                                    | U                                                                                                                                                                                    | N/A                                                                                                                           | Y                                        | Y                                         | 6/8   |
| Levi et al,<br>2017 <sup>69</sup>                               | Y                                                                | Y                                                             | Y                                                                     | U                                                                    | Y                                                                                                                                                                                    | N/A                                                                                                                           | Y                                        | Y                                         | 6/8   |
| Moss et al,<br>2018 <sup>59</sup>                               | Y                                                                | U                                                             | U                                                                     | U                                                                    | U                                                                                                                                                                                    | N/A                                                                                                                           | U                                        | Y                                         | 2/8   |
| Pettigrew et<br>al, 2019 <sup>58</sup>                          | Y                                                                | Y                                                             | Y                                                                     | Y                                                                    | Y                                                                                                                                                                                    | N/A                                                                                                                           | Y                                        | Y                                         | 7/8   |

| <b>First author,<br/>publication<br/>year<sup>ref. no</sup></b> | 1. Did the<br>study<br>address a<br>clearly<br>focused<br>issue? | 2. Was the<br>cohort<br>recruited in an<br>acceptable<br>way? | 3. Was the<br>exposure<br>accurately<br>measured to<br>minimise bias? | 4. Was the<br>outcome<br>accurately<br>measured to<br>minimise bias? | 5.a Have the authors<br>identified all<br>important<br>confounding factors?<br><br>5.b Have they taken<br>account of the<br>confounding factors<br>in the design and/or<br>analysis? | 6.a Was the<br>follow up of<br>subjects<br>complete<br>enough?<br><br>6.b Was the<br>follow up of<br>subjects long<br>enough? | 7. How<br>precise<br>are the<br>results? | 8. Do you<br>believe in<br>the<br>results | Score |
|-----------------------------------------------------------------|------------------------------------------------------------------|---------------------------------------------------------------|-----------------------------------------------------------------------|----------------------------------------------------------------------|--------------------------------------------------------------------------------------------------------------------------------------------------------------------------------------|-------------------------------------------------------------------------------------------------------------------------------|------------------------------------------|-------------------------------------------|-------|
| Pollom et al,<br>2018 <sup>77</sup>                             | Y                                                                | Y                                                             | U                                                                     | U                                                                    | U                                                                                                                                                                                    | N/A                                                                                                                           | Y                                        | Y                                         | 3/8   |
| Tuck et al,<br>2015 <sup>80</sup>                               | Y                                                                | Y                                                             | Y                                                                     | Y                                                                    | U                                                                                                                                                                                    | N/A                                                                                                                           | U                                        | Y                                         | 5/8   |
| Vandervoort<br>et al, 2014 <sup>10</sup>                        | Y                                                                | Y                                                             | U                                                                     | U                                                                    | Y                                                                                                                                                                                    | N/A                                                                                                                           | Y                                        | Y                                         | 5/8   |
| Walter et al,<br>2019 <sup>19</sup>                             | Y                                                                | Y                                                             | Y                                                                     | Y                                                                    | Y                                                                                                                                                                                    | N/A                                                                                                                           | U                                        | U                                         | 5/8   |

Y= yes; N= no; N/A= not applicable; U= unknown.
