# Supplementary material for: Advance Care Planning in Neurodegenerative Disorders: A Scoping Review
Source: Int J Environ Res Public Health. 2022 Jan 12;19(2):803. doi: 10.3390/ijerph19020803 (PMC8775509; doi:10.3390/ijerph19020803)
Supplement: Supplementary file 1 [file ijerph-19-00803-s001.zip]

Archive with 10 entries (10 files):
- Fig. S1.pdf
- Fig. S2_Risk of bias summary ACP.pdf
- File S1.pdf
- File S2.pdf
- Table S1.pdf
- Table S2.pdf
- Table S3s.pdf
- Table S4.pdf
- Table S5.pdf
- Table S6.pdf
