# Supplementary figures and images for: Advance Care Planning in Neurodegenerative Disorders: A Scoping Review
Source: MDPI journal article supplement (doi:10.3390/ijerph19020803), 2022-01-12

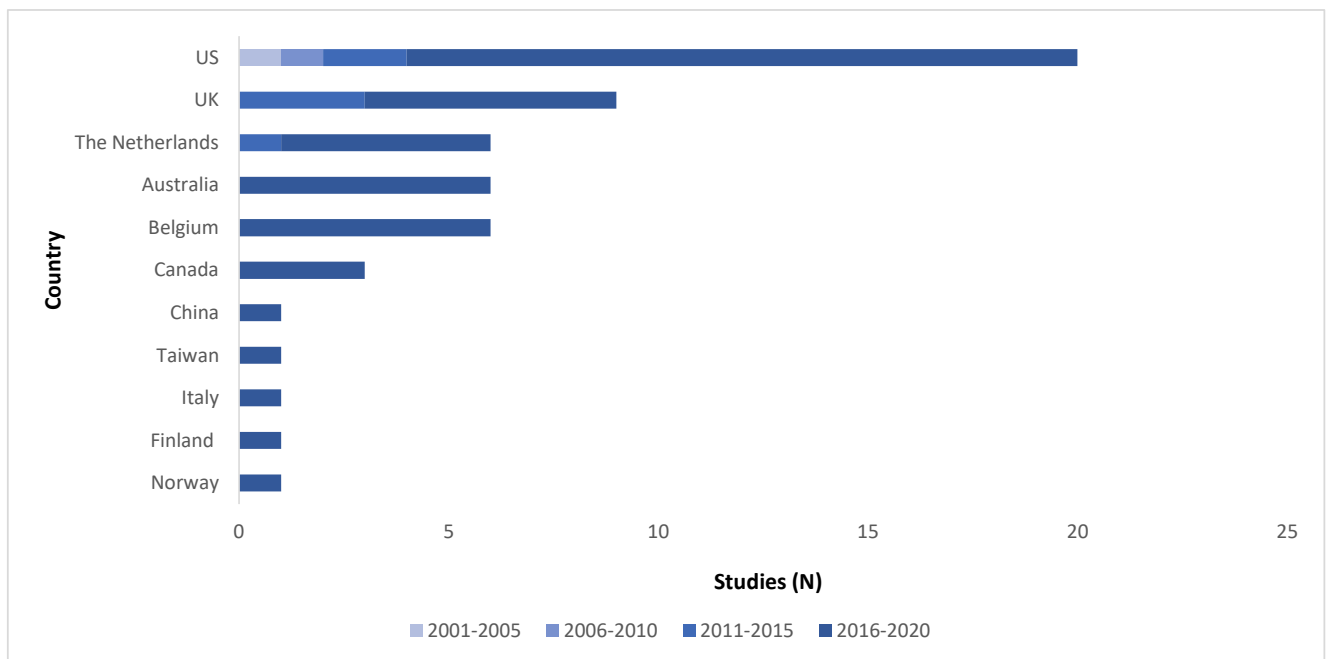

Supplement: s1 [file s1]
